# Supplementary material for: Impact of conservation tillage on wheat performance and its microbiome
Source: Front Plant Sci. 2023 Aug 21;14:1211758. doi: 10.3389/fpls.2023.1211758 (PMC10475739; doi:10.3389/fpls.2023.1211758)
Supplement: Supplementary file 3 [file Table_6.xlsx]

## Sheet: Table 6
[1] "K00906..isocitrate.dehydrogenase.kinase.phosphatase..EC.2.7.11.5.3.1.3..."								[1] "K01338..ATP.dependent.Lon.protease..EC.3.4.21.53."
Df Sum Sq Mean Sq F value Pr(>F)								Df Sum Sq Mean Sq F value Pr(>F)
Tillage 1 5.020e-10 5.018e-10 4.624 0.0342 *								Tillage 1 3.000e-10 3.380e-10 0.064 0.802
H2O_treatment 1 9.200e-11 9.240e-11 0.852 0.3585								H2O_treatment 1 9.500e-09 9.543e-09 1.791 0.184
Fertilized 1 1.730e-10 1.732e-10 1.596 0.2097								Fertilized 1 1.230e-08 1.232e-08 2.312 0.132
Genotype1 3 6.260e-10 2.087e-10 1.923 0.1316								Genotype1 3 7.100e-09 2.358e-09 0.443 0.723
Residuals 89 9.658e-09 1.085e-10								Residuals 89 4.743e-07 5.330e-09
---								[1] "K01358..ATP.dependent.Clp.protease..protease.subunit..EC.3.4.21.92."
Signif. codes: 0 ‘***’ 0.001 ‘**’ 0.01 ‘*’ 0.05 ‘.’ 0.1 ‘ ’ 1								Df Sum Sq Mean Sq F value Pr(>F)
[1] "K01077..alkaline.phosphatase..EC.3.1.3.1."								Tillage 1 2.390e-10 2.391e-10 3.671 0.0586 .
Df Sum Sq Mean Sq F value Pr(>F)								H2O_treatment 1 1.400e-11 1.369e-11 0.210 0.6478
Tillage 1 2.000e-12 1.530e-12 0.014 0.907								Fertilized 1 9.200e-11 9.198e-11 1.412 0.2379
H2O_treatment 1 4.200e-11 4.192e-11 0.372 0.543								Genotype1 3 1.740e-10 5.789e-11 0.889 0.4503
Fertilized 1 1.880e-10 1.876e-10 1.667 0.200								Residuals 89 5.798e-09 6.515e-11
Genotype1 3 1.880e-10 6.260e-11 0.556 0.645								---
Residuals 89 1.002e-08 1.126e-10								Signif. codes: 0 ‘***’ 0.001 ‘**’ 0.01 ‘*’ 0.05 ‘.’ 0.1 ‘ ’ 1
[1] "K01078..acid.phosphatase..EC.3.1.3.2."								[1] "K01407..protease.III..EC.3.4.24.55."
Df Sum Sq Mean Sq F value Pr(>F)								Df Sum Sq Mean Sq F value Pr(>F)
Tillage 1 5.200e-12 5.238e-12 0.435 0.511								Tillage 1 6.900e-12 6.921e-12 0.491 0.485
H2O_treatment 1 9.800e-12 9.780e-12 0.811 0.370								H2O_treatment 1 4.900e-12 4.902e-12 0.348 0.557
Fertilized 1 2.260e-11 2.260e-11 1.875 0.174								Fertilized 1 1.400e-12 1.408e-12 0.100 0.753
Genotype1 3 6.420e-11 2.140e-11 1.776 0.158								Genotype1 3 7.770e-11 2.591e-11 1.839 0.146
Residuals 89 1.073e-09 1.205e-11								Residuals 89 1.254e-09 1.409e-11
[1] "K01079..phosphoserine.phosphatase..EC.3.1.3.3."								[1] "K01419..ATP.dependent.HslUV.protease..peptidase.subunit.HslV..EC.3.4.25.2."
Df Sum Sq Mean Sq F value Pr(>F)								Df Sum Sq Mean Sq F value Pr(>F)
Tillage 1 1.14e-10 1.138e-10 0.391 0.533								Tillage 1 7.02e-11 7.016e-11 2.787 0.0985 .
H2O_treatment 1 4.81e-10 4.812e-10 1.654 0.202								H2O_treatment 1 3.61e-11 3.614e-11 1.436 0.2340
Fertilized 1 3.90e-10 3.904e-10 1.342 0.250								Fertilized 1 2.92e-11 2.923e-11 1.161 0.2841
Genotype1 3 3.81e-10 1.269e-10 0.436 0.728								Genotype1 3 2.02e-11 6.750e-12 0.268 0.8482
Residuals 89 2.59e-08 2.910e-10								Residuals 89 2.24e-09 2.517e-11
[1] "K01085..glucose.1.phosphatase..EC.3.1.3.10."								---
Df Sum Sq Mean Sq F value Pr(>F)								Signif. codes: 0 ‘***’ 0.001 ‘**’ 0.01 ‘*’ 0.05 ‘.’ 0.1 ‘ ’ 1
Tillage 1 9.900e-13 9.870e-13 0.609 0.4372								[1] "K03544..ATP.dependent.Clp.protease.ATP.binding.subunit.ClpX"
H2O_treatment 1 4.200e-13 4.200e-13 0.259 0.6120								Df Sum Sq Mean Sq F value Pr(>F)
Fertilized 1 8.500e-13 8.540e-13 0.527 0.4697								Tillage 1 7.440e-10 7.443e-10 5.335 0.0232 *
Genotype1 3 1.367e-11 4.558e-12 2.815 0.0437 *								H2O_treatment 1 8.000e-12 7.700e-12 0.055 0.8150
Residuals 89 1.441e-10 1.619e-12								Fertilized 1 1.000e-12 1.000e-12 0.007 0.9340
---								Genotype1 3 9.860e-10 3.286e-10 2.355 0.0773 .
Signif. codes: 0 ‘***’ 0.001 ‘**’ 0.01 ‘*’ 0.05 ‘.’ 0.1 ‘ ’ 1								Residuals 89 1.242e-08 1.395e-10
[1] "K01087..trehalose.6.phosphate.phosphatase..EC.3.1.3.12."								---
Df Sum Sq Mean Sq F value Pr(>F)								Signif. codes: 0 ‘***’ 0.001 ‘**’ 0.01 ‘*’ 0.05 ‘.’ 0.1 ‘ ’ 1
Tillage 1 1.750e-10 1.748e-10 1.659 0.201								[1] "K03605..hydrogenase.1.maturation.protease..EC.3.4.24..."
H2O_treatment 1 2.700e-11 2.695e-11 0.256 0.614								Df Sum Sq Mean Sq F value Pr(>F)
Fertilized 1 4.500e-11 4.479e-11 0.425 0.516								Tillage 1 3.360e-11 3.364e-11 5.792 0.0182 *
Genotype1 3 5.910e-10 1.971e-10 1.871 0.140								H2O_treatment 1 9.000e-12 9.030e-12 1.554 0.2158
Residuals 89 9.375e-09 1.053e-10								Fertilized 1 2.430e-11 2.427e-11 4.179 0.0439 *
[1] "K01089..imidazoleglycerol.phosphate.dehydratase...histidinol.phosphatase..EC.4.2.1.19.3.1.3.15."								Genotype1 3 3.690e-11 1.231e-11 2.119 0.1034
Df Sum Sq Mean Sq F value Pr(>F)								Residuals 89 5.169e-10 5.810e-12
Tillage 1 7.400e-11 7.360e-11 1.535 0.2187								---
H2O_treatment 1 5.000e-12 4.730e-12 0.099 0.7541								Signif. codes: 0 ‘***’ 0.001 ‘**’ 0.01 ‘*’ 0.05 ‘.’ 0.1 ‘ ’ 1
Fertilized 1 2.220e-10 2.221e-10 4.631 0.0341 *								[1] "K03667..ATP.dependent.HslUV.protease.ATP.binding.subunit.HslU"
Genotype1 3 2.540e-10 8.460e-11 1.764 0.1598								Df Sum Sq Mean Sq F value Pr(>F)
Residuals 89 4.268e-09 4.796e-11								Tillage 1 2.89e-10 2.892e-10 3.625 0.0601 .
---								H2O_treatment 1 6.80e-11 6.752e-11 0.846 0.3601
Signif. codes: 0 ‘***’ 0.001 ‘**’ 0.01 ‘*’ 0.05 ‘.’ 0.1 ‘ ’ 1								Fertilized 1 7.20e-11 7.154e-11 0.897 0.3462
[1] "K01090..protein.phosphatase..EC.3.1.3.16."								Genotype1 3 9.80e-11 3.270e-11 0.410 0.7463
Df Sum Sq Mean Sq F value Pr(>F)								Residuals 89 7.10e-09 7.978e-11
Tillage 1 2.000e-10 2.030e-10 0.198 0.657								---
H2O_treatment 1 1.700e-09 1.702e-09 1.660 0.201								Signif. codes: 0 ‘***’ 0.001 ‘**’ 0.01 ‘*’ 0.05 ‘.’ 0.1 ‘ ’ 1
Fertilized 1 8.300e-10 8.271e-10 0.807 0.372								[1] "K03694..ATP.dependent.Clp.protease.ATP.binding.subunit.ClpA"
Genotype1 3 3.210e-09 1.070e-09 1.044 0.377								Df Sum Sq Mean Sq F value Pr(>F)
Residuals 89 9.125e-08 1.025e-09								Tillage 1 1.30e-09 1.340e-09 0.215 0.644
[1] "K01091..phosphoglycolate.phosphatase..EC.3.1.3.18."								H2O_treatment 1 1.08e-08 1.077e-08 1.727 0.192
Df Sum Sq Mean Sq F value Pr(>F)								Fertilized 1 1.32e-08 1.320e-08 2.118 0.149
Tillage 1 8.000e-11 8.030e-11 0.102 0.7503								Genotype1 3 1.09e-08 3.638e-09 0.583 0.627
H2O_treatment 1 1.360e-09 1.363e-09 1.730 0.1917								Residuals 89 5.55e-07 6.236e-09
Fertilized 1 2.940e-09 2.941e-09 3.733 0.0565 .								[1] "K03695..ATP.dependent.Clp.protease.ATP.binding.subunit.ClpB"
Genotype1 3 7.400e-10 2.480e-10 0.315 0.8147								Df Sum Sq Mean Sq F value Pr(>F)
Residuals 89 7.012e-08 7.879e-10								Tillage 1 1.470e-09 1.474e-09 2.327 0.131
---								H2O_treatment 1 1.320e-09 1.322e-09 2.088 0.152
Signif. codes: 0 ‘***’ 0.001 ‘**’ 0.01 ‘*’ 0.05 ‘.’ 0.1 ‘ ’ 1								Fertilized 1 1.210e-09 1.205e-09 1.903 0.171
[1] "K01092..myo.inositol.1.or.4..monophosphatase..EC.3.1.3.25."								Genotype1 3 8.800e-10 2.938e-10 0.464 0.708
Df Sum Sq Mean Sq F value Pr(>F)								Residuals 89 5.636e-08 6.333e-10
Tillage 1 3.210e-09 3.211e-09 1.106 0.296								[1] "K03696..ATP.dependent.Clp.protease.ATP.binding.subunit.ClpC"
H2O_treatment 1 5.260e-09 5.260e-09 1.812 0.182								Df Sum Sq Mean Sq F value Pr(>F)
Fertilized 1 1.330e-09 1.331e-09 0.459 0.500								Tillage 1 2.00e-10 1.690e-10 0.020 0.889
Genotype1 3 9.980e-09 3.328e-09 1.146 0.335								H2O_treatment 1 1.28e-08 1.282e-08 1.498 0.224
Residuals 89 2.584e-07 2.903e-09								Fertilized 1 1.30e-08 1.302e-08 1.521 0.221
[1] "K01093..4.phytase...acid.phosphatase..EC.3.1.3.26.3.1.3.2."								Genotype1 3 2.56e-08 8.545e-09 0.998 0.398
Df Sum Sq Mean Sq F value Pr(>F)								Residuals 89 7.62e-07 8.562e-09
Tillage 1 2.200e-11 2.201e-11 0.358 0.5514								[1] "K03697..ATP.dependent.Clp.protease.ATP.binding.subunit.ClpE"
H2O_treatment 1 9.500e-11 9.514e-11 1.546 0.2170								Df Sum Sq Mean Sq F value Pr(>F)
Fertilized 1 2.780e-10 2.777e-10 4.511 0.0365 *								Tillage 1 5.800e-10 5.770e-10 0.190 0.664
Genotype1 3 1.260e-10 4.203e-11 0.683 0.5648								H2O_treatment 1 4.140e-09 4.141e-09 1.367 0.246
Residuals 89 5.478e-09 6.155e-11								Fertilized 1 4.780e-09 4.785e-09 1.579 0.212
---								Genotype1 3 8.290e-09 2.764e-09 0.912 0.439
Signif. codes: 0 ‘***’ 0.001 ‘**’ 0.01 ‘*’ 0.05 ‘.’ 0.1 ‘ ’ 1								Residuals 89 2.697e-07 3.030e-09
[1] "K01095..phosphatidylglycerophosphatase.A..EC.3.1.3.27."								[1] "K03797..carboxyl.terminal.processing.protease..EC.3.4.21.102."
Df Sum Sq Mean Sq F value Pr(>F)								Df Sum Sq Mean Sq F value Pr(>F)
Tillage 1 4.000e-11 3.988e-11 0.614 0.435								Tillage 1 2.210e-09 2.207e-09 4.131 0.0451 *
H2O_treatment 1 8.500e-11 8.465e-11 1.304 0.257								H2O_treatment 1 4.000e-11 3.800e-11 0.071 0.7912
Fertilized 1 1.300e-11 1.333e-11 0.205 0.652								Fertilized 1 3.280e-09 3.284e-09 6.146 0.0151 *
Genotype1 3 2.920e-10 9.719e-11 1.497 0.221								Genotype1 3 2.980e-09 9.950e-10 1.861 0.1419
Residuals 89 5.777e-09 6.492e-11								Residuals 89 4.756e-08 5.340e-10
[1] "K01096..phosphatidylglycerophosphatase.B..EC.3.1.3.27."								---
Df Sum Sq Mean Sq F value Pr(>F)								Signif. codes: 0 ‘***’ 0.001 ‘**’ 0.01 ‘*’ 0.05 ‘.’ 0.1 ‘ ’ 1
Tillage 1 1.500e-12 1.460e-12 0.079 0.780								[1] "K03798..cell.division.protease.FtsH..EC.3.4.24..."
H2O_treatment 1 1.680e-11 1.681e-11 0.904 0.344								Df Sum Sq Mean Sq F value Pr(>F)
Fertilized 1 2.600e-12 2.590e-12 0.139 0.710								Tillage 1 1.392e-09 1.392e-09 6.035 0.016 *
Genotype1 3 9.770e-11 3.257e-11 1.752 0.162								H2O_treatment 1 2.100e-11 2.060e-11 0.089 0.766
Residuals 89 1.655e-09 1.859e-11								Fertilized 1 1.000e-12 6.000e-13 0.003 0.960
[1] "K01101..4.nitrophenyl.phosphatase..EC.3.1.3.41."								Genotype1 3 1.358e-09 4.527e-10 1.962 0.125
Df Sum Sq Mean Sq F value Pr(>F)								Residuals 89 2.053e-08 2.307e-10
Tillage 1 3.000e-11 2.930e-11 0.041 0.841								---
H2O_treatment 1 1.080e-09 1.081e-09 1.498 0.224								Signif. codes: 0 ‘***’ 0.001 ‘**’ 0.01 ‘*’ 0.05 ‘.’ 0.1 ‘ ’ 1
Fertilized 1 1.260e-09 1.260e-09 1.746 0.190								[1] "K04076..Lon.like.ATP.dependent.protease..EC.3.4.21..."
Genotype1 3 1.870e-09 6.232e-10 0.863 0.463								Df Sum Sq Mean Sq F value Pr(>F)
Residuals 89 6.426e-08 7.220e-10								Tillage 1 3.500e-11 3.536e-11 0.501 0.481
[1] "K01103..6.phosphofructo.2.kinase...fructose.2.6.bisphosphatase..EC.2.7.1.105.3.1.3.46."								H2O_treatment 1 1.060e-10 1.058e-10 1.500 0.224
Df Sum Sq Mean Sq F value Pr(>F)								Fertilized 1 1.410e-10 1.414e-10 2.005 0.160
Tillage 1 7.300e-17 7.290e-17 0.254 0.6156								Genotype1 3 1.010e-10 3.359e-11 0.476 0.700
H2O_treatment 1 4.290e-16 4.287e-16 1.492 0.2251								Residuals 89 6.277e-09 7.053e-11
Fertilized 1 2.600e-17 2.630e-17 0.092 0.7629								[1] "K04086..ATP.dependent.Clp.protease.ATP.binding.subunit.ClpL"
Genotype1 3 2.165e-15 7.216e-16 2.512 0.0637 .								Df Sum Sq Mean Sq F value Pr(>F)
Residuals 89 2.557e-14 2.873e-16								Tillage 1 4.200e-10 4.201e-10 0.230 0.633
---								H2O_treatment 1 2.560e-09 2.559e-09 1.402 0.240
Signif. codes: 0 ‘***’ 0.001 ‘**’ 0.01 ‘*’ 0.05 ‘.’ 0.1 ‘ ’ 1								Fertilized 1 2.740e-09 2.740e-09 1.501 0.224
[1] "K01104..protein.tyrosine.phosphatase..EC.3.1.3.48."								Genotype1 3 5.360e-09 1.786e-09 0.978 0.407
Df Sum Sq Mean Sq F value Pr(>F)								Residuals 89 1.625e-07 1.826e-09
Tillage 1 3.500e-10 3.470e-10 0.109 0.743								[1] "K04087..membrane.protease.subunit.HflC..EC.3.4....."
H2O_treatment 1 4.320e-09 4.320e-09 1.351 0.248								Df Sum Sq Mean Sq F value Pr(>F)
Fertilized 1 4.360e-09 4.362e-09 1.365 0.246								Tillage 1 0.000e+00 1.000e-13 0.000 0.987
Genotype1 3 1.055e-08 3.515e-09 1.100 0.354								H2O_treatment 1 6.900e-10 6.855e-10 1.520 0.221
Residuals 89 2.845e-07 3.197e-09								Fertilized 1 1.180e-09 1.179e-09 2.613 0.110
[1] "K01113..alkaline.phosphatase.D..EC.3.1.3.1."								Genotype1 3 6.900e-10 2.293e-10 0.508 0.677
Df Sum Sq Mean Sq F value Pr(>F)								Residuals 89 4.014e-08 4.510e-10
Tillage 1 1.300e-10 1.304e-10 0.240 0.625								[1] "K04088..membrane.protease.subunit.HflK..EC.3.4....."
H2O_treatment 1 7.600e-10 7.568e-10 1.395 0.241								Df Sum Sq Mean Sq F value Pr(>F)
Fertilized 1 9.400e-10 9.422e-10 1.737 0.191								Tillage 1 2.000e-11 1.840e-11 0.019 0.889
Genotype1 3 1.220e-09 4.075e-10 0.751 0.524								H2O_treatment 1 1.490e-09 1.491e-09 1.580 0.212
Residuals 89 4.828e-08 5.425e-10								Fertilized 1 2.170e-09 2.167e-09 2.296 0.133
[1] "K01507..inorganic.pyrophosphatase..EC.3.6.1.1."								Genotype1 3 1.710e-09 5.712e-10 0.605 0.613
Df Sum Sq Mean Sq F value Pr(>F)								Residuals 89 8.398e-08 9.437e-10
Tillage 1 3.800e-11 3.760e-11 0.186 0.667								[1] "K04691..serine.protease.DegS..EC.3.4.21..."
H2O_treatment 1 3.920e-10 3.923e-10 1.946 0.166								Df Sum Sq Mean Sq F value Pr(>F)
Fertilized 1 5.480e-10 5.479e-10 2.718 0.103								Tillage 1 1.790e-10 1.788e-10 1.232 0.270
Genotype1 3 2.360e-10 7.870e-11 0.390 0.760								H2O_treatment 1 4.900e-11 4.879e-11 0.336 0.564
Residuals 89 1.794e-08 2.016e-10								Fertilized 1 9.000e-12 9.370e-12 0.065 0.800
[1] "K01512..acylphosphatase..EC.3.6.1.7."								Genotype1 3 5.920e-10 1.975e-10 1.360 0.260
Df Sum Sq Mean Sq F value Pr(>F)								Residuals 89 1.292e-08 1.452e-10
Tillage 1 8.000e-12 7.880e-12 0.130 0.719								[1] "K04770..Lon.like.ATP.dependent.protease..EC.3.4.21..."
H2O_treatment 1 1.290e-10 1.293e-10 2.129 0.148								Df Sum Sq Mean Sq F value Pr(>F)
Fertilized 1 1.370e-10 1.372e-10 2.258 0.136								Tillage 1 1.190e-11 1.189e-11 0.744 0.391
Genotype1 3 1.280e-10 4.277e-11 0.704 0.552								H2O_treatment 1 4.000e-12 4.011e-12 0.251 0.618
Residuals 89 5.406e-09 6.074e-11								Fertilized 1 0.000e+00 3.900e-14 0.002 0.961
[1] "K01515..ADP.ribose.pyrophosphatase..EC.3.6.1.13."								Genotype1 3 9.360e-11 3.120e-11 1.952 0.127
Df Sum Sq Mean Sq F value Pr(>F)								Residuals 89 1.422e-09 1.598e-11
Tillage 1 2.100e-11 2.140e-11 0.079 0.779								[1] "K04771..serine.protease.Do..EC.3.4.21.107."
H2O_treatment 1 2.950e-10 2.953e-10 1.097 0.298								Df Sum Sq Mean Sq F value Pr(>F)
Fertilized 1 5.400e-11 5.400e-11 0.201 0.655								Tillage 1 1.650e-11 1.651e-11 2.415 0.124
Genotype1 3 1.638e-09 5.460e-10 2.029 0.116								H2O_treatment 1 7.700e-12 7.687e-12 1.125 0.292
Residuals 89 2.395e-08 2.691e-10								Fertilized 1 9.000e-13 8.850e-13 0.129 0.720
[1] "K01518..bis.5..nucleosidyl..tetraphosphatase..EC.3.6.1.17."								Genotype1 3 9.800e-12 3.274e-12 0.479 0.698
Df Sum Sq Mean Sq F value Pr(>F)								Residuals 89 6.083e-10 6.834e-12
Tillage 1 1.820e-13 1.816e-13 1.014 0.317								[1] "K04772..serine.protease.DegQ..EC.3.4.21..."
H2O_treatment 1 1.820e-13 1.816e-13 1.014 0.317								Df Sum Sq Mean Sq F value Pr(>F)
Fertilized 1 1.790e-13 1.789e-13 0.999 0.320								Tillage 1 1.130e-11 1.126e-11 1.100 0.2972
Genotype1 3 5.350e-13 1.784e-13 0.996 0.399								H2O_treatment 1 7.500e-12 7.506e-12 0.733 0.3942
Residuals 89 1.594e-11 1.791e-13								Fertilized 1 1.900e-12 1.886e-12 0.184 0.6688
[1] "K01520..dUTP.pyrophosphatase..EC.3.6.1.23."								Genotype1 3 6.840e-11 2.279e-11 2.226 0.0906 .
Df Sum Sq Mean Sq F value Pr(>F)								Residuals 89 9.112e-10 1.024e-11
Tillage 1 2.620e-10 2.623e-10 6.527 0.0123 *								---
H2O_treatment 1 4.200e-11 4.159e-11 1.035 0.3118								Signif. codes: 0 ‘***’ 0.001 ‘**’ 0.01 ‘*’ 0.05 ‘.’ 0.1 ‘ ’ 1
Fertilized 1 4.200e-11 4.160e-11 1.035 0.3117								[1] "K04773..protease.IV..EC.3.4.21..."
Genotype1 3 3.100e-11 1.049e-11 0.261 0.8534								Df Sum Sq Mean Sq F value Pr(>F)
Residuals 89 3.577e-09 4.019e-11								Tillage 1 1.300e-10 1.339e-10 0.203 0.6536
---								H2O_treatment 1 1.390e-09 1.394e-09 2.111 0.1497
Signif. codes: 0 ‘***’ 0.001 ‘**’ 0.01 ‘*’ 0.05 ‘.’ 0.1 ‘ ’ 1								Fertilized 1 2.480e-09 2.478e-09 3.752 0.0559 .
[1] "K01521..CDP.diacylglycerol.pyrophosphatase..EC.3.6.1.26."								Genotype1 3 6.400e-10 2.118e-10 0.321 0.8104
Df Sum Sq Mean Sq F value Pr(>F)								Residuals 89 5.877e-08 6.604e-10
Tillage 1 1.36e-12 1.361e-12 1.121 0.2925								---
H2O_treatment 1 7.00e-14 7.100e-14 0.058 0.8098								Signif. codes: 0 ‘***’ 0.001 ‘**’ 0.01 ‘*’ 0.05 ‘.’ 0.1 ‘ ’ 1
Fertilized 1 7.01e-12 7.015e-12 5.780 0.0183 *								[1] "K04774..serine.protease.SohB..EC.3.4.21..."
Genotype1 3 5.43e-12 1.810e-12 1.491 0.2224								Df Sum Sq Mean Sq F value Pr(>F)
Residuals 89 1.08e-10 1.214e-12								Tillage 1 2.750e-10 2.747e-10 3.547 0.0629 .
---								H2O_treatment 1 2.500e-11 2.540e-11 0.328 0.5683
Signif. codes: 0 ‘***’ 0.001 ‘**’ 0.01 ‘*’ 0.05 ‘.’ 0.1 ‘ ’ 1								Fertilized 1 3.000e-12 3.150e-12 0.041 0.8407
[1] "K01524..exopolyphosphatase...guanosine.5..triphosphate.3..diphosphate.pyrophosphatase..EC.3.6.1.11.3.6.1.40."								Genotype1 3 2.270e-10 7.562e-11 0.976 0.4076
Df Sum Sq Mean Sq F value Pr(>F)								Residuals 89 6.893e-09 7.745e-11
Tillage 1 3.500e-09 3.479e-09 0.735 0.394								---
H2O_treatment 1 8.900e-09 8.941e-09 1.887 0.173								Signif. codes: 0 ‘***’ 0.001 ‘**’ 0.01 ‘*’ 0.05 ‘.’ 0.1 ‘ ’ 1
Fertilized 1 6.000e-09 5.967e-09 1.260 0.265								[1] "K04775..protease.YdgD..EC.3.4.21..."
Genotype1 3 1.130e-08 3.780e-09 0.798 0.498								Df Sum Sq Mean Sq F value Pr(>F)
Residuals 89 4.216e-07 4.737e-09								Tillage 1 3.000e-14 2.770e-14 0.061 0.806
[1] "K01525..bis.5..nucleosyl..tetraphosphatase..symmetrical...EC.3.6.1.41."								H2O_treatment 1 1.300e-13 1.335e-13 0.294 0.589
Df Sum Sq Mean Sq F value Pr(>F)								Fertilized 1 2.000e-13 1.985e-13 0.436 0.511
Tillage 1 3.770e-10 3.771e-10 2.715 0.1029								Genotype1 3 1.410e-12 4.713e-13 1.037 0.380
H2O_treatment 1 7.800e-11 7.760e-11 0.558 0.4568								Residuals 89 4.047e-11 4.547e-13
Fertilized 1 2.670e-10 2.672e-10 1.924 0.1689								[1] "K05520..protease.I..EC.3.2....."
Genotype1 3 9.890e-10 3.297e-10 2.374 0.0755 .								Df Sum Sq Mean Sq F value Pr(>F)
Residuals 89 1.236e-08 1.389e-10								Tillage 1 7.800e-11 7.787e-11 1.374 0.244
---								H2O_treatment 1 5.100e-11 5.137e-11 0.906 0.344
Signif. codes: 0 ‘***’ 0.001 ‘**’ 0.01 ‘*’ 0.05 ‘.’ 0.1 ‘ ’ 1								Fertilized 1 7.000e-11 6.954e-11 1.227 0.271
[1] "K01622..fructose.1.6.bisphosphate.aldolase.phosphatase..EC.4.1.2.13.3.1.3.11."								Genotype1 3 6.900e-11 2.309e-11 0.407 0.748
Df Sum Sq Mean Sq F value Pr(>F)								Residuals 89 5.044e-09 5.668e-11
Tillage 1 2.570e-12 2.570e-12 5.259 0.0242 *								[1] "K06012..spore.protease..EC.3.4.24.78."
H2O_treatment 1 6.700e-13 6.672e-13 1.366 0.2457								Df Sum Sq Mean Sq F value Pr(>F)
Fertilized 1 1.910e-12 1.906e-12 3.902 0.0513 .								Tillage 1 1.700e-11 1.700e-11 0.492 0.485
Genotype1 3 3.070e-12 1.023e-12 2.094 0.1066								H2O_treatment 1 5.190e-11 5.188e-11 1.503 0.224
Residuals 89 4.349e-11 4.886e-13								Fertilized 1 7.290e-11 7.288e-11 2.111 0.150
---								Genotype1 3 4.590e-11 1.529e-11 0.443 0.723
Signif. codes: 0 ‘***’ 0.001 ‘**’ 0.01 ‘*’ 0.05 ‘.’ 0.1 ‘ ’ 1								Residuals 89 3.073e-09 3.453e-11
[1] "K02226..alpha.ribazole.phosphatase..EC.3.1.3.73."								[1] "K06891..ATP.dependent.Clp.protease.adaptor.protein.ClpS"
Df Sum Sq Mean Sq F value Pr(>F)								Df Sum Sq Mean Sq F value Pr(>F)
Tillage 1 1.000e-12 1.000e-12 0.060 0.807								Tillage 1 4.000e-12 3.670e-12 0.026 0.873
H2O_treatment 1 2.450e-11 2.452e-11 1.470 0.229								H2O_treatment 1 2.130e-10 2.129e-10 1.502 0.224
Fertilized 1 3.250e-11 3.253e-11 1.951 0.166								Fertilized 1 2.060e-10 2.060e-10 1.454 0.231
Genotype1 3 3.940e-11 1.312e-11 0.787 0.504								Genotype1 3 3.860e-10 1.287e-10 0.909 0.440
Residuals 89 1.484e-09 1.667e-11								Residuals 89 1.261e-08 1.417e-10
[1] "K02428..dITP.XTP.pyrophosphatase..EC.3.6.1.19."								[1] "K06985..aspartyl.protease.family.protein"
Df Sum Sq Mean Sq F value Pr(>F)								Df Sum Sq Mean Sq F value Pr(>F)
Tillage 1 3.220e-10 3.22e-10 6.567 0.0121 *								Tillage 1 3.400e-11 3.370e-11 0.196 0.659
H2O_treatment 1 0.000e+00 1.00e-13 0.003 0.9588								H2O_treatment 1 1.550e-10 1.548e-10 0.900 0.345
Fertilized 1 0.000e+00 1.00e-13 0.001 0.9706								Fertilized 1 7.000e-12 7.300e-12 0.042 0.838
Genotype1 3 1.910e-10 6.37e-11 1.300 0.2796								Genotype1 3 1.263e-09 4.210e-10 2.447 0.069 .
Residuals 89 4.364e-09 4.90e-11								Residuals 89 1.531e-08 1.720e-10
---								---
Signif. codes: 0 ‘***’ 0.001 ‘**’ 0.01 ‘*’ 0.05 ‘.’ 0.1 ‘ ’ 1								Signif. codes: 0 ‘***’ 0.001 ‘**’ 0.01 ‘*’ 0.05 ‘.’ 0.1 ‘ ’ 1
[1] "K02446..fructose.1.6.bisphosphatase.II..EC.3.1.3.11."								[1] "K07263..zinc.protease..EC.3.4.24..."
Df Sum Sq Mean Sq F value Pr(>F)								Df Sum Sq Mean Sq F value Pr(>F)
Tillage 1 8.500e-10 8.455e-10 1.070 0.304								Tillage 1 2.150e-09 2.153e-09 1.230 0.270
H2O_treatment 1 1.410e-09 1.407e-09 1.780 0.186								H2O_treatment 1 4.340e-09 4.335e-09 2.477 0.119
Fertilized 1 2.500e-10 2.501e-10 0.317 0.575								Fertilized 1 1.870e-09 1.875e-09 1.071 0.304
Genotype1 3 2.590e-09 8.648e-10 1.094 0.356								Genotype1 3 4.980e-09 1.660e-09 0.948 0.421
Residuals 89 7.033e-08 7.902e-10								Residuals 89 1.558e-07 1.750e-09
[1] "K03270..3.deoxy.D.manno.octulosonate.8.phosphate.phosphatase..KDO.8.P.phosphatase...EC.3.1.3.45."								[1] "K07387..putative.metalloprotease..EC.3.4.24..."
Df Sum Sq Mean Sq F value Pr(>F)								Df Sum Sq Mean Sq F value Pr(>F)
Tillage 1 1.380e-10 1.379e-10 2.502 0.1172								Tillage 1 8.90e-12 8.942e-12 1.545 0.217
H2O_treatment 1 3.600e-11 3.570e-11 0.648 0.4231								H2O_treatment 1 3.10e-12 3.086e-12 0.533 0.467
Fertilized 1 9.500e-11 9.506e-11 1.724 0.1925								Fertilized 1 5.00e-13 4.890e-13 0.084 0.772
Genotype1 3 3.980e-10 1.328e-10 2.409 0.0723 .								Genotype1 3 3.34e-11 1.114e-11 1.924 0.131
Residuals 89 4.906e-09 5.513e-11								Residuals 89 5.15e-10 5.787e-12
---								[1] "K07395..putative.proteasome.type.protease"
Signif. codes: 0 ‘***’ 0.001 ‘**’ 0.01 ‘*’ 0.05 ‘.’ 0.1 ‘ ’ 1								Df Sum Sq Mean Sq F value Pr(>F)
[1] "K03273..D.glycero.D.manno.heptose.1.7.bisphosphate.phosphatase..EC.3.1.3.82.3.1.3.83."								Tillage 1 2.000e-12 2.440e-12 0.042 0.839
Df Sum Sq Mean Sq F value Pr(>F)								H2O_treatment 1 6.700e-11 6.673e-11 1.140 0.289
Tillage 1 1.824e-10 1.824e-10 5.811 0.018 *								Fertilized 1 9.500e-11 9.530e-11 1.628 0.205
H2O_treatment 1 1.770e-11 1.774e-11 0.565 0.454								Genotype1 3 1.330e-10 4.441e-11 0.758 0.520
Fertilized 1 4.750e-11 4.751e-11 1.513 0.222								Residuals 89 5.211e-09 5.855e-11
Genotype1 3 1.090e-10 3.634e-11 1.158 0.331								[1] "K07403..membrane.bound.serine.protease..ClpP.class."
Residuals 89 2.794e-09 3.139e-11								Df Sum Sq Mean Sq F value Pr(>F)
---								Tillage 1 5.870e-11 5.865e-11 2.006 0.160
Signif. codes: 0 ‘***’ 0.001 ‘**’ 0.01 ‘*’ 0.05 ‘.’ 0.1 ‘ ’ 1								H2O_treatment 1 5.700e-12 5.670e-12 0.194 0.661
[1] "K03426..NAD..diphosphatase..EC.3.6.1.22."								Fertilized 1 0.000e+00 1.000e-14 0.000 0.985
Df Sum Sq Mean Sq F value Pr(>F)								Genotype1 3 5.820e-11 1.939e-11 0.663 0.577
Tillage 1 3.500e-11 3.530e-11 0.132 0.717								Residuals 89 2.603e-09 2.925e-11
H2O_treatment 1 5.740e-10 5.739e-10 2.154 0.146								[1] "K08303..putative.protease..EC.3.4....."
Fertilized 1 4.690e-10 4.689e-10 1.760 0.188								Df Sum Sq Mean Sq F value Pr(>F)
Genotype1 3 7.160e-10 2.388e-10 0.896 0.446								Tillage 1 4.000e-11 4.300e-11 0.018 0.895
Residuals 89 2.371e-08 2.664e-10								H2O_treatment 1 2.370e-09 2.374e-09 0.966 0.328
[1] "K03574..7.8.dihydro.8.oxoguanine.triphosphatase..EC.3.6.1..."								Fertilized 1 1.570e-09 1.570e-09 0.639 0.426
Df Sum Sq Mean Sq F value Pr(>F)								Genotype1 3 1.148e-08 3.828e-09 1.557 0.205
Tillage 1 1.000e-10 9.820e-11 0.129 0.720								Residuals 89 2.188e-07 2.458e-09
H2O_treatment 1 1.250e-09 1.246e-09 1.642 0.203								[1] "K08315..hydrogenase.3.maturation.protease..EC.3.4.23.51."
Fertilized 1 4.700e-10 4.750e-10 0.626 0.431								Df Sum Sq Mean Sq F value Pr(>F)
Genotype1 3 2.410e-09 8.032e-10 1.059 0.371								Tillage 1 1.150e-13 1.146e-13 1.423 0.2361
Residuals 89 6.752e-08 7.586e-10								H2O_treatment 1 6.700e-14 6.672e-14 0.829 0.3651
[1] "K03788..acid.phosphatase..class.B...EC.3.1.3.2."								Fertilized 1 9.000e-15 8.750e-15 0.109 0.7424
Df Sum Sq Mean Sq F value Pr(>F)								Genotype1 3 5.670e-13 1.890e-13 2.347 0.0781 .
Tillage 1 5.900e-13 5.878e-13 0.359 0.551								Residuals 89 7.166e-12 8.052e-14
H2O_treatment 1 1.400e-12 1.404e-12 0.856 0.357								---
Fertilized 1 1.330e-12 1.325e-12 0.808 0.371								Signif. codes: 0 ‘***’ 0.001 ‘**’ 0.01 ‘*’ 0.05 ‘.’ 0.1 ‘ ’ 1
Genotype1 3 7.580e-12 2.526e-12 1.541 0.210								[1] "K08372..putative.serine.protease.PepD..EC.3.4.21..."
Residuals 89 1.459e-10 1.639e-12								Df Sum Sq Mean Sq F value Pr(>F)
[1] "K03841..fructose.1.6.bisphosphatase.I..EC.3.1.3.11."								Tillage 1 5.20e-13 5.158e-13 1.248 0.267
Df Sum Sq Mean Sq F value Pr(>F)								H2O_treatment 1 8.00e-13 8.005e-13 1.936 0.168
Tillage 1 4.400e-10 4.401e-10 2.895 0.0924 .								Fertilized 1 7.70e-13 7.660e-13 1.853 0.177
H2O_treatment 1 6.100e-11 6.100e-11 0.401 0.5282								Genotype1 3 8.90e-13 2.950e-13 0.713 0.546
Fertilized 1 2.940e-10 2.940e-10 1.934 0.1678								Residuals 89 3.68e-11 4.135e-13
Genotype1 3 6.900e-10 2.301e-10 1.514 0.2165								[1] "K08477..outer.membrane.protease.E..EC.3.4.21..."
Residuals 89 1.353e-08 1.520e-10								Df Sum Sq Mean Sq F value Pr(>F)
---								Tillage 1 0.00e+00 8.000e-17 0.002 0.965
Signif. codes: 0 ‘***’ 0.001 ‘**’ 0.01 ‘*’ 0.05 ‘.’ 0.1 ‘ ’ 1								H2O_treatment 1 2.30e-14 2.265e-14 0.532 0.468
[1] "K04041..fructose.1.6.bisphosphatase.III..EC.3.1.3.11."								Fertilized 1 3.50e-14 3.501e-14 0.822 0.367
Df Sum Sq Mean Sq F value Pr(>F)								Genotype1 3 2.56e-13 8.530e-14 2.003 0.119
Tillage 1 1.000e-11 1.400e-11 0.008 0.931								Residuals 89 3.79e-12 4.258e-14
H2O_treatment 1 2.980e-09 2.977e-09 1.572 0.213								[1] "K08567..hydrogenase.2.maturation.protease..EC.3.4.24..."
Fertilized 1 3.530e-09 3.528e-09 1.864 0.176								Df Sum Sq Mean Sq F value Pr(>F)
Genotype1 3 4.600e-09 1.532e-09 0.809 0.492								Tillage 1 4.490e-13 4.487e-13 2.227 0.1391
Residuals 89 1.685e-07 1.893e-09								H2O_treatment 1 1.120e-13 1.116e-13 0.554 0.4586
[1] "K04486..histidinol.phosphatase..PHP.family...EC.3.1.3.15."								Fertilized 1 7.200e-14 7.200e-14 0.357 0.5515
Df Sum Sq Mean Sq F value Pr(>F)								Genotype1 3 1.798e-12 5.992e-13 2.974 0.0359 *
Tillage 1 1.000e-12 1.100e-12 0.005 0.943								Residuals 89 1.793e-11 2.014e-13
H2O_treatment 1 3.290e-10 3.289e-10 1.504 0.223								---
Fertilized 1 4.240e-10 4.236e-10 1.937 0.167								Signif. codes: 0 ‘***’ 0.001 ‘**’ 0.01 ‘*’ 0.05 ‘.’ 0.1 ‘ ’ 1
Genotype1 3 4.910e-10 1.637e-10 0.749 0.526								[1] "K08598..YopJ.protease.family"
Residuals 89 1.946e-08 2.187e-10								Df Sum Sq Mean Sq F value Pr(>F)
[1] "K04765..ATP.diphosphatase..EC.3.6.1.8."								Tillage 1 9.000e-11 9.048e-11 2.121 0.149
Df Sum Sq Mean Sq F value Pr(>F)								H2O_treatment 1 9.300e-11 9.333e-11 2.187 0.143
Tillage 1 9.000e-11 8.560e-11 0.142 0.707								Fertilized 1 6.200e-11 6.154e-11 1.442 0.233
H2O_treatment 1 1.110e-09 1.109e-09 1.837 0.179								Genotype1 3 4.500e-11 1.492e-11 0.350 0.789
Fertilized 1 1.340e-09 1.342e-09 2.223 0.140								Residuals 89 3.797e-09 4.267e-11
Genotype1 3 1.080e-09 3.601e-10 0.597 0.619								[1] "K08642..LasA.protease..EC.3.4.24..."
Residuals 89 5.373e-08 6.037e-10								Df Sum Sq Mean Sq F value Pr(>F)
[1] "K05518..negative.regulator.of.sigma.B..phosphoserine.phosphatase...EC.3.1.3.3."								Tillage 1 8.800e-12 8.785e-12 2.013 0.159
Df Sum Sq Mean Sq F value Pr(>F)								H2O_treatment 1 3.900e-12 3.862e-12 0.885 0.349
Tillage 1 3.200e-12 3.170e-12 0.134 0.715								Fertilized 1 1.000e-13 8.500e-14 0.019 0.889
H2O_treatment 1 3.530e-11 3.525e-11 1.490 0.225								Genotype1 3 1.380e-11 4.588e-12 1.051 0.374
Fertilized 1 4.810e-11 4.806e-11 2.031 0.158								Residuals 89 3.883e-10 4.363e-12
Genotype1 3 4.430e-11 1.478e-11 0.624 0.601								[1] "K08643..zinc.metalloprotease.ZmpB..EC.3.4.24..."
Residuals 89 2.106e-09 2.366e-11								Df Sum Sq Mean Sq F value Pr(>F)
[1] "K05602..histidinol.phosphatase..EC.3.1.3.15."								Tillage 1 3.800e-10 3.754e-10 1.013 0.317
Df Sum Sq Mean Sq F value Pr(>F)								H2O_treatment 1 3.800e-10 3.758e-10 1.014 0.317
Tillage 1 7.970e-13 7.965e-13 2.548 0.1140								Fertilized 1 3.700e-10 3.701e-10 0.999 0.320
H2O_treatment 1 7.070e-13 7.065e-13 2.260 0.1363								Genotype1 3 1.110e-09 3.689e-10 0.996 0.399
Fertilized 1 9.470e-13 9.473e-13 3.030 0.0852 .								Residuals 89 3.298e-08 3.705e-10
Genotype1 3 4.550e-13 1.517e-13 0.485 0.6935								[1] "K08676..tricorn.protease..EC.3.4.21..."
Residuals 89 2.782e-11 3.126e-13								Df Sum Sq Mean Sq F value Pr(>F)
---								Tillage 1 1.50e-12 1.471e-12 0.365 0.547
Signif. codes: 0 ‘***’ 0.001 ‘**’ 0.01 ‘*’ 0.05 ‘.’ 0.1 ‘ ’ 1								H2O_treatment 1 7.00e-13 6.670e-13 0.165 0.685
[1] "K05978..glucosylglycerol.3.phosphatase..EC.3.1.3.69."								Fertilized 1 4.30e-12 4.306e-12 1.068 0.304
Df Sum Sq Mean Sq F value Pr(>F)								Genotype1 3 5.50e-12 1.842e-12 0.457 0.713
Tillage 1 5.710e-14 5.708e-14 2.522 0.116								Residuals 89 3.59e-10 4.034e-12
H2O_treatment 1 1.410e-14 1.414e-14 0.625 0.431								[1] "K09682..MarR.family.transcriptional.regulator..protease.production.regulatory.protein.HPr"
Fertilized 1 1.500e-15 1.510e-15 0.067 0.797								Df Sum Sq Mean Sq F value Pr(>F)
Genotype1 3 6.470e-14 2.155e-14 0.952 0.419								Tillage 1 5.100e-12 5.141e-12 0.454 0.502
Residuals 89 2.014e-12 2.263e-14								H2O_treatment 1 1.690e-11 1.687e-11 1.490 0.225
[1] "K05979..2.phosphosulfolactate.phosphatase..EC.3.1.3.71."								Fertilized 1 2.320e-11 2.320e-11 2.049 0.156
Df Sum Sq Mean Sq F value Pr(>F)								Genotype1 3 1.610e-11 5.379e-12 0.475 0.700
Tillage 1 1.16e-12 1.161e-12 0.478 0.491								Residuals 89 1.008e-09 1.132e-11
H2O_treatment 1 2.60e-12 2.604e-12 1.073 0.303								[1] "K10913..TetR.AcrR.family.transcriptional.regulator..hemagglutinin.protease.regulatory.protein"
Fertilized 1 3.67e-12 3.674e-12 1.513 0.222								Df Sum Sq Mean Sq F value Pr(>F)
Genotype1 3 5.01e-12 1.670e-12 0.688 0.562								Tillage 1 8.500e-14 8.487e-14 1.107 0.296
Residuals 89 2.16e-10 2.428e-12								H2O_treatment 1 1.120e-13 1.121e-13 1.463 0.230
[1] "K06019..pyrophosphatase.PpaX..EC.3.6.1.1."								Fertilized 1 1.420e-13 1.424e-13 1.858 0.176
Df Sum Sq Mean Sq F value Pr(>F)								Genotype1 3 1.090e-13 3.630e-14 0.474 0.701
Tillage 1 1.000e-11 1.029e-11 0.187 0.666								Residuals 89 6.822e-12 7.665e-14
H2O_treatment 1 8.300e-11 8.313e-11 1.512 0.222								[1] "K11749..regulator.of.sigma.E.protease..EC.3.4.24..."
Fertilized 1 1.130e-10 1.129e-10 2.053 0.155								Df Sum Sq Mean Sq F value Pr(>F)
Genotype1 3 9.700e-11 3.247e-11 0.590 0.623								Tillage 1 4.030e-10 4.029e-10 1.829 0.180
Residuals 89 4.894e-09 5.499e-11								H2O_treatment 1 1.880e-10 1.880e-10 0.853 0.358
[1] "K06153..undecaprenyl.diphosphatase..EC.3.6.1.27."								Fertilized 1 8.100e-11 8.080e-11 0.367 0.546
Df Sum Sq Mean Sq F value Pr(>F)								Genotype1 3 1.330e-09 4.432e-10 2.012 0.118
Tillage 1 6.200e-11 6.184e-11 0.973 0.3267								Residuals 89 1.961e-08 2.203e-10
H2O_treatment 1 2.700e-11 2.706e-11 0.426 0.5158								[1] "K12536..ATP.binding.cassette..subfamily.C..bacterial.exporter.for.protease.lipase"
Fertilized 1 2.000e-12 1.580e-12 0.025 0.8750								Df Sum Sq Mean Sq F value Pr(>F)
Genotype1 3 4.390e-10 1.463e-10 2.301 0.0826 .								Tillage 1 2.130e-10 2.129e-10 2.102 0.151
Residuals 89 5.659e-09 6.358e-11								H2O_treatment 1 7.100e-11 7.071e-11 0.698 0.406
---								Fertilized 1 1.000e-12 1.400e-12 0.014 0.907
Signif. codes: 0 ‘***’ 0.001 ‘**’ 0.01 ‘*’ 0.05 ‘.’ 0.1 ‘ ’ 1								Genotype1 3 2.810e-10 9.363e-11 0.925 0.432
[1] "K06352..phosphatase.RapA.inhibitor"								Residuals 89 9.012e-09 1.013e-10
Df Sum Sq Mean Sq F value Pr(>F)								[1] "K12537..protease.secretion.protein.HasE"
Tillage 1 9.000e-15 9.021e-15 0.952 0.332								Df Sum Sq Mean Sq F value Pr(>F)
H2O_treatment 1 1.180e-14 1.182e-14 1.247 0.267								Tillage 1 1.050e-10 1.054e-10 1.915 0.170
Fertilized 1 1.820e-14 1.825e-14 1.925 0.169								H2O_treatment 1 4.200e-11 4.233e-11 0.769 0.383
Genotype1 3 9.800e-15 3.273e-15 0.345 0.793								Fertilized 1 0.000e+00 3.900e-13 0.007 0.933
Residuals 89 8.437e-13 9.479e-15								Genotype1 3 1.770e-10 5.912e-11 1.075 0.364
[1] "K06353..phosphatase.RapC.regulator"								Residuals 89 4.897e-09 5.502e-11
Df Sum Sq Mean Sq F value Pr(>F)								[1] "K12684..serine.protease.autotransporter..EC.3.4.21..."
Tillage 1 2.240e-15 2.242e-15 1.025 0.314								Df Sum Sq Mean Sq F value Pr(>F)
H2O_treatment 1 2.680e-15 2.680e-15 1.226 0.271								Tillage 1 9.000e-13 9.100e-13 0.181 0.671
Fertilized 1 4.170e-15 4.173e-15 1.909 0.171								H2O_treatment 1 3.200e-12 3.220e-12 0.641 0.426
Genotype1 3 2.170e-15 7.220e-16 0.330 0.804								Fertilized 1 4.300e-12 4.268e-12 0.849 0.359
Residuals 89 1.946e-13 2.186e-15								Genotype1 3 2.480e-11 8.259e-12 1.644 0.185
[1] "K06355..phosphatase.RapF.regulator"								Residuals 89 4.472e-10 5.024e-12
Df Sum Sq Mean Sq F value Pr(>F)								[1] "K12685..subtilase.type.serine.protease..EC.3.4.21..."
Tillage 1 1.420e-15 1.419e-15 1.059 0.306								Df Sum Sq Mean Sq F value Pr(>F)
H2O_treatment 1 1.630e-15 1.628e-15 1.216 0.273								Tillage 1 2.600e-10 2.599e-10 5.500 0.0212 *
Fertilized 1 2.550e-15 2.545e-15 1.901 0.171								H2O_treatment 1 2.000e-12 1.680e-12 0.036 0.8509
Genotype1 3 1.300e-15 4.330e-16 0.323 0.808								Fertilized 1 1.960e-10 1.961e-10 4.150 0.0446 *
Residuals 89 1.192e-13 1.339e-15								Genotype1 3 1.030e-10 3.438e-11 0.728 0.5382
[1] "K06359..response.regulator.aspartate.phosphatase.A..stage.0.sporulation.protein.L...EC.3.1....."								Residuals 89 4.205e-09 4.725e-11
Df Sum Sq Mean Sq F value Pr(>F)								---
Tillage 1 3.100e-12 3.117e-12 0.650 0.422								Signif. codes: 0 ‘***’ 0.001 ‘**’ 0.01 ‘*’ 0.05 ‘.’ 0.1 ‘ ’ 1
H2O_treatment 1 6.400e-12 6.369e-12 1.329 0.252								[1] "K12688..autotransporter.serine.protease..EC.3.4.21..."
Fertilized 1 9.600e-12 9.568e-12 1.996 0.161								Df Sum Sq Mean Sq F value Pr(>F)
Genotype1 3 6.100e-12 2.022e-12 0.422 0.738								Tillage 1 2.900e-15 2.920e-15 0.134 0.7155
Residuals 89 4.266e-10 4.794e-12								H2O_treatment 1 2.900e-15 2.920e-15 0.134 0.7151
[1] "K06360..response.regulator.aspartate.phosphatase.B..EC.3.1....."								Fertilized 1 3.100e-15 3.070e-15 0.141 0.7084
Df Sum Sq Mean Sq F value Pr(>F)								Genotype1 3 1.511e-13 5.037e-14 2.310 0.0817 .
Tillage 1 8.600e-13 8.614e-13 0.987 0.323								Residuals 89 1.940e-12 2.180e-14
H2O_treatment 1 1.080e-12 1.079e-12 1.237 0.269								---
Fertilized 1 1.670e-12 1.674e-12 1.918 0.170								Signif. codes: 0 ‘***’ 0.001 ‘**’ 0.01 ‘*’ 0.05 ‘.’ 0.1 ‘ ’ 1
Genotype1 3 8.900e-13 2.950e-13 0.338 0.798								[1] "K13274..cell.wall.associated.protease..EC.3.4.21..."
Residuals 89 7.766e-11 8.726e-13								Df Sum Sq Mean Sq F value Pr(>F)
[1] "K06361..response.regulator.aspartate.phosphatase.C..EC.3.1....."								Tillage 1 8.900e-12 8.940e-12 0.541 0.464
Df Sum Sq Mean Sq F value Pr(>F)								H2O_treatment 1 2.260e-11 2.256e-11 1.365 0.246
Tillage 1 1.590e-12 1.587e-12 0.874 0.352								Fertilized 1 3.230e-11 3.230e-11 1.954 0.166
H2O_treatment 1 2.300e-12 2.301e-12 1.268 0.263								Genotype1 3 2.270e-11 7.580e-12 0.458 0.712
Fertilized 1 3.530e-12 3.533e-12 1.946 0.166								Residuals 89 1.471e-09 1.653e-11
Genotype1 3 1.980e-12 6.610e-13 0.364 0.779								[1] "K13275..major.intracellular.serine.protease..EC.3.4.21..."
Residuals 89 1.616e-10 1.815e-12								Df Sum Sq Mean Sq F value Pr(>F)
[1] "K06362..response.regulator.aspartate.phosphatase.D..EC.3.1....."								Tillage 1 4.000e-12 3.998e-12 0.277 0.600
Df Sum Sq Mean Sq F value Pr(>F)								H2O_treatment 1 2.140e-11 2.141e-11 1.483 0.226
Tillage 1 1.160e-12 1.155e-12 0.798 0.374								Fertilized 1 2.890e-11 2.888e-11 2.001 0.161
H2O_treatment 1 1.870e-12 1.869e-12 1.290 0.259								Genotype1 3 2.400e-11 8.009e-12 0.555 0.646
Fertilized 1 2.850e-12 2.847e-12 1.966 0.164								Residuals 89 1.285e-09 1.443e-11
Genotype1 3 1.660e-12 5.540e-13 0.382 0.766								[1] "K13277..minor.extracellular.protease.Epr..EC.3.4.21..."
Residuals 89 1.289e-10 1.448e-12								Df Sum Sq Mean Sq F value Pr(>F)
[1] "K06363..response.regulator.aspartate.phosphatase.E..EC.3.1....."								Tillage 1 3.100e-12 3.137e-12 0.711 0.401
Df Sum Sq Mean Sq F value Pr(>F)								H2O_treatment 1 5.800e-12 5.779e-12 1.310 0.255
Tillage 1 6.000e-15 6.450e-15 0.134 0.715								Fertilized 1 9.000e-12 8.959e-12 2.031 0.158
H2O_treatment 1 7.000e-14 7.009e-14 1.453 0.231								Genotype1 3 5.400e-12 1.786e-12 0.405 0.750
Fertilized 1 9.800e-14 9.768e-14 2.026 0.158								Residuals 89 3.926e-10 4.411e-12
Genotype1 3 9.000e-14 2.992e-14 0.621 0.604								[1] "K13520..outer.membrane.protease..EC.3.4.23..."
Residuals 89 4.292e-12 4.822e-14								Df Sum Sq Mean Sq F value Pr(>F)
[1] "K06364..response.regulator.aspartate.phosphatase.F..EC.3.1....."								Tillage 1 2.00e-17 2.010e-17 0.033 0.856
Df Sum Sq Mean Sq F value Pr(>F)								H2O_treatment 1 1.20e-16 1.167e-16 0.192 0.662
Tillage 1 1.26e-12 1.265e-12 1.014 0.317								Fertilized 1 1.30e-16 1.252e-16 0.206 0.651
H2O_treatment 1 1.53e-12 1.532e-12 1.229 0.271								Genotype1 3 3.78e-15 1.260e-15 2.077 0.109
Fertilized 1 2.38e-12 2.384e-12 1.912 0.170								Residuals 89 5.40e-14 6.068e-16
Genotype1 3 1.24e-12 4.148e-13 0.333 0.802								[1] "K14645..serine.protease..EC.3.4.21..."
Residuals 89 1.11e-10 1.247e-12								Df Sum Sq Mean Sq F value Pr(>F)
[1] "K06365..response.regulator.aspartate.phosphatase.G..EC.3.1....."								Tillage 1 8.050e-10 8.051e-10 2.765 0.0999 .
Df Sum Sq Mean Sq F value Pr(>F)								H2O_treatment 1 5.000e-11 4.980e-11 0.171 0.6802
Tillage 1 2.40e-14 2.403e-14 0.250 0.618								Fertilized 1 1.987e-09 1.987e-09 6.824 0.0106 *
H2O_treatment 1 1.38e-13 1.377e-13 1.433 0.234								Genotype1 3 1.369e-09 4.565e-10 1.567 0.2029
Fertilized 1 1.95e-13 1.954e-13 2.034 0.157								Residuals 89 2.592e-08 2.912e-10
Genotype1 3 1.61e-13 5.361e-14 0.558 0.644								---
Residuals 89 8.55e-12 9.607e-14								Signif. codes: 0 ‘***’ 0.001 ‘**’ 0.01 ‘*’ 0.05 ‘.’ 0.1 ‘ ’ 1
[1] "K06366..response.regulator.aspartate.phosphatase.H..EC.3.1....."								[1] "K14647..minor.extracellular.serine.protease.Vpr..EC.3.4.21..."
Df Sum Sq Mean Sq F value Pr(>F)								Df Sum Sq Mean Sq F value Pr(>F)
Tillage 1 7.90e-13 7.881e-13 0.668 0.416								Tillage 1 1.700e-11 1.723e-11 0.205 0.652
H2O_treatment 1 1.56e-12 1.562e-12 1.324 0.253								H2O_treatment 1 1.200e-10 1.205e-10 1.433 0.235
Fertilized 1 2.35e-12 2.346e-12 1.988 0.162								Fertilized 1 1.680e-10 1.681e-10 1.999 0.161
Genotype1 3 1.47e-12 4.906e-13 0.416 0.742								Genotype1 3 1.510e-10 5.041e-11 0.599 0.617
Residuals 89 1.05e-10 1.180e-12								Residuals 89 7.486e-09 8.411e-11
[1] "K06367..response.regulator.aspartate.phosphatase.I..EC.3.1....."								[1] "K14742..hypothetical.protease..EC.3.4....."
Df Sum Sq Mean Sq F value Pr(>F)								Df Sum Sq Mean Sq F value Pr(>F)
Tillage 1 1.100e-16 1.129e-16 0.195 0.660								Tillage 1 1.573e-10 1.573e-10 5.090 0.0265 *
H2O_treatment 1 8.400e-16 8.375e-16 1.447 0.232								H2O_treatment 1 1.560e-11 1.560e-11 0.505 0.4792
Fertilized 1 1.180e-15 1.178e-15 2.035 0.157								Fertilized 1 7.250e-11 7.252e-11 2.346 0.1291
Genotype1 3 1.020e-15 3.387e-16 0.585 0.626								Genotype1 3 1.813e-10 6.044e-11 1.955 0.1265
Residuals 89 5.153e-14 5.790e-16								Residuals 89 2.751e-09 3.091e-11
								---
								Signif. codes: 0 ‘***’ 0.001 ‘**’ 0.01 ‘*’ 0.05 ‘.’ 0.1 ‘ ’ 1
